# Supplementary material
Source: PubMed Central journal article supplement (PMC6613108)
Supplement: pnas.1902922116.sapp.pdf [file pnas.1902922116.sapp.pdf]

Supplementary Information for

***Shigella* promotes major alteration of gut epithelial physiology and tissue invasion  
by shutting off host intracellular transport**

Mariana L. Ferrari, Valérie Malardé, Alexandre Grassart, Laura Salavessa, Giulia Nigro,  
Stéphane Decorps-Declere, John R. Rohde, Pamela Schnupf, Vanessa Masson,  
Guillaume Arras, Damarys Loew, Philippe J. Sansonetti, Nathalie Sauvonnet

Correspondence:

Nathalie Sauvonnet Email: [nathalie.sauvonnet@pasteur.fr](mailto:nathalie.sauvonnet@pasteur.fr)

Philippe Sansonetti Email: [philippe.sansonetti@pasteur.fr](mailto:philippe.sansonetti@pasteur.fr)

**This PDF file includes:**

Figs. S1 to S4

Tables S1

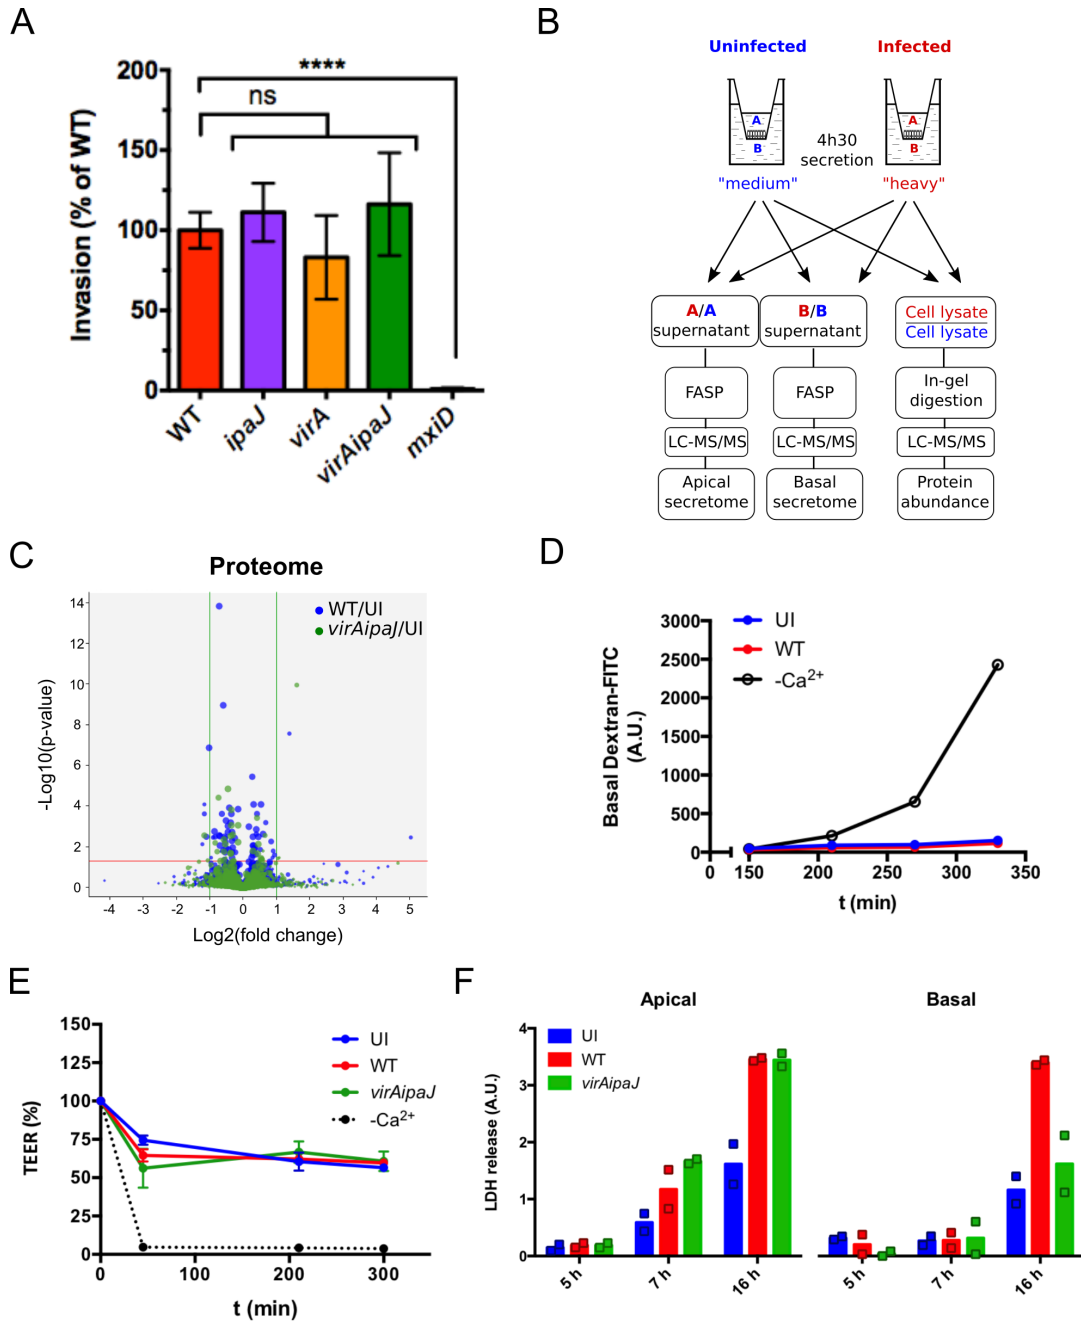

**Fig. S1.** (A) Gentamicin protection assay of WT in comparison with *ipaJ*, *virA*, *virAipaJ* and the non-invasive mutant *mxiD*. Mean  $\pm$  SD. n = 3. Ns: non significant; \*\*\*\*p<0.0001 (one-way ANOVA, Dunnett's *post-hoc* test). (B) Schematic representation of the experimental setup, proteomics workflow and data analysis of the SILAC LC-MS/MS experiment. (C) Volcano plots displaying log<sub>2</sub> fold change of total proteome for WT (blue) and *virAipaJ* (green) infected cells in comparison with uninfected (UI) conditions. (D-F) Dextran 70 kDa permeability (D), transepithelial electrical resistance (TEER) (E), and lactate dehydrogenase (LDH) release (F) over time in Caco-2/TC7 cells grown in transwell filters. Cells were UI, WT- or *virAipaJ*-infected, or incubated in medium without Ca<sup>2+</sup> (-Ca<sup>2+</sup>) for (D) and (E).

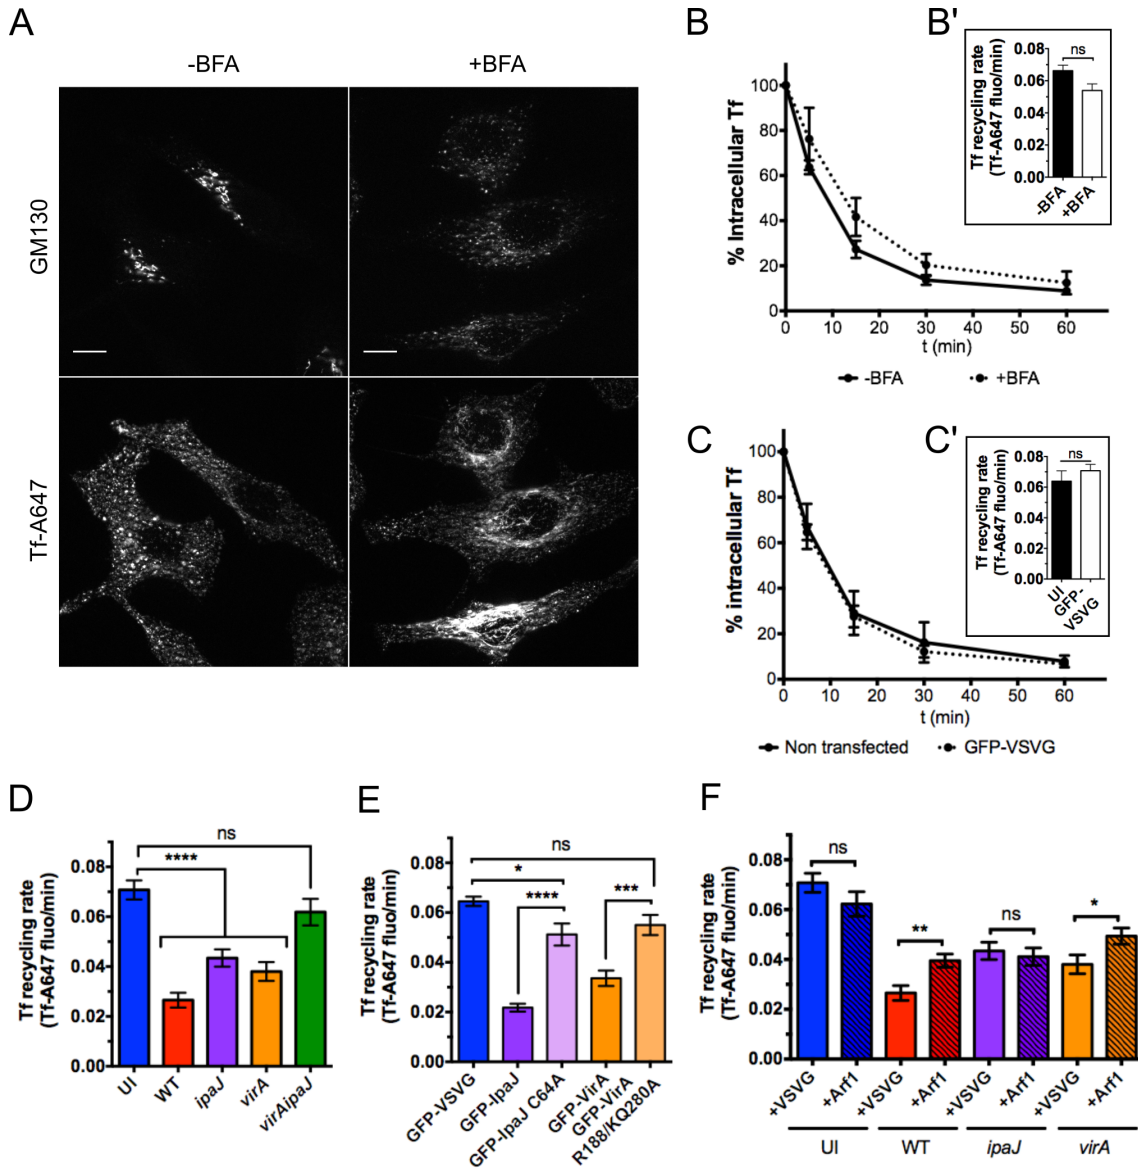

**Fig. S2.** (A) *Cis*-Golgi (GM130) and recycling endosomes (Tf-A647) structure upon BFA treatment. Hep2 cells were loaded with Tf-AF647 and incubated with or without BFA for 30 minutes and then stained with an anti-GM130 antibody. Scale bar: 10  $\mu$ m. (B) Tf recycling kinetics upon BFA treatment. Hep2 cells were loaded with Tf-AF647, BFA was added (+BFA) or not (-BFA) to the medium for 30 minutes and cells were then chased with the unlabeled holo-Tf for up to 60 minutes. The loss of intracellular Tf-AF647 fluorescence was monitored over-time by FC. (C) Tf-AF647 recycling kinetics in non-transfected or GFP-VSVG transfected Hep2 cells. B-C, mean  $\pm$  SD, n = 3. (B'-C') Tf recycling rates for kinetics depicted on Fig. S2B-C. Mean  $\pm$  SE. ns: non significant (unpaired two-tailed Welch's *t*-test). (D-E-F) Tf recycling rates for kinetics depicted on Fig. 2B-C-D, respectively. Mean  $\pm$  SE. ns: non significant; \**p*<0.05; \*\**p*<0.01; \*\*\**p*<0.001; \*\*\*\**p*<0.0001 (D, one-way ANOVA, Dunnett's *post-hoc* test; E, one-way ANOVA, Tukey's *post-hoc* test; F, unpaired two-tailed Welch's *t*-test).

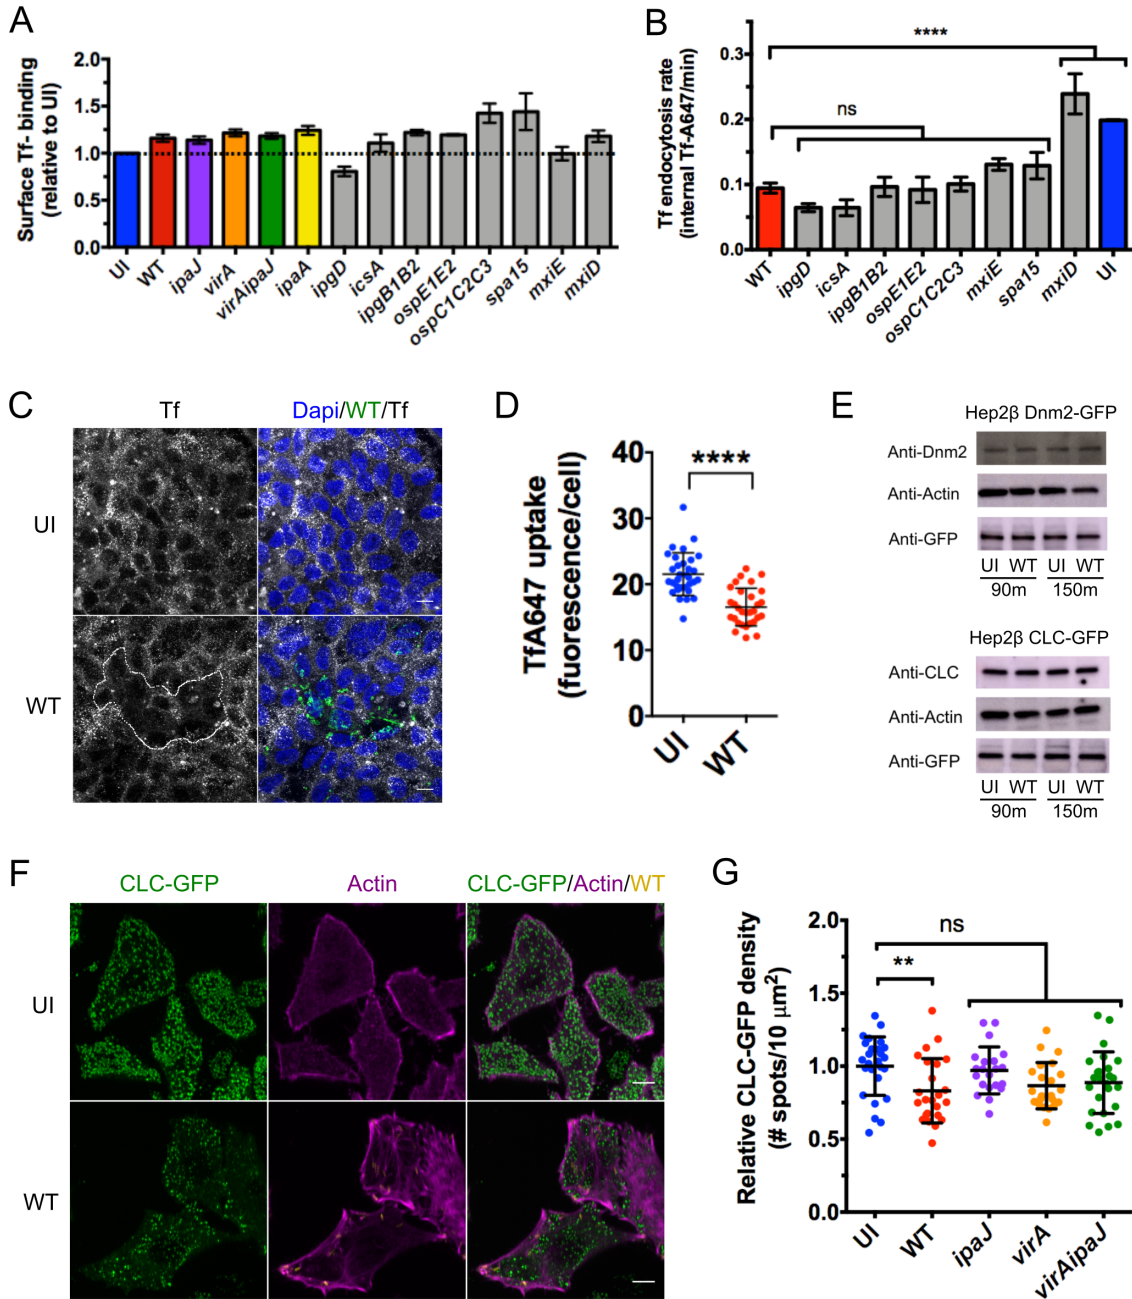

**Fig. S3:** (A) Surface TfR upon infection with different *S. flexneri* strains. Hep2 cells were uninfected (UI) or infected with GFP-WT or mutant strains for 90 min and then incubated at 4 °C in the presence of Tf-AF647 for 30 minutes. The total surface Tf-AF647 fluorescence was quantified by FC, and represented relative to UI conditions. Mean  $\pm$  SD,  $n \geq 3$ . (B) Endocytosis inhibition upon infection with different *S. flexneri* strains. Hep2 cells were left UI or infected with GFP-expressing WT or mutant strains for 90 min, prior to monitor by FC the Tf-AF647 uptake over time. The endocytosis rate was calculated during the first 5 min of kinetics. Mean  $\pm$  SD,  $n \geq 3$ . Ns: non significant;

\*\*\*\* $p < 0.0001$  (one-way ANOVA, Dunnett's *post-hoc* test). (C) Tf uptake is decreased in infected polarized cells. Caco-2/TC7 cells were grown in transwell filters up to polarization and differentiation. Cells were UI (upper panel) or challenged with WT strain (lower panel) for 4 hours. Tf-Cy3 was added to the basolateral compartment and left for 15 min at 37 °C to allow for Tf uptake, fixed and stained with Dapi and rabbit anti-LPS followed by anti-rabbit-A488. Scale bar: 10  $\mu\text{m}$ . ROI: infected cells. (D) Quantification of Tf-A647 uptake on Caco-2/TC7 cells, represented as total Tf-A647 fluorescence/cell. Mean  $\pm$  SD,  $n = 32$  cells in each condition, representative of two independent experiments. \*\*\*\* $p < 0.0001$  (Mann-Whitney test). (E) Western blots of Hep2 $\beta$  Dnm2-GFP (upper panel) or Hep2 $\beta$  CLC-GFP (bottom panel) of cells UI or infected for 90 or 150 minutes with WT *S. flexneri*. Cell lysates were immunoblotted with anti-Dnm2, anti-CLTA, anti-GFP and anti-Actin. (F-G) CLC-GFP density at plasma membrane. Hep2 $\beta$  CLC-GFP cells were UI or infected with WT or mutant strains for 90 minutes, fixed, labeled with rabbit anti-LPS followed by anti-rabbit-A405 and Phalloidin-A647, and imaged with a confocal (F) or a TIRF (G) microscope. Scale bar: 10  $\mu\text{m}$ . (G) Quantification of CLC-GFP density (number of CLC-GFP spots/area) at plasma membrane from TIRF microscopy images. Mean  $\pm$  SD.  $21 < n < 27$  cells pooled from 2 independent experiments. Ns, non significant; \*\* $p < 0.01$  (one-way ANOVA, Dunnett's *post-hoc* test).

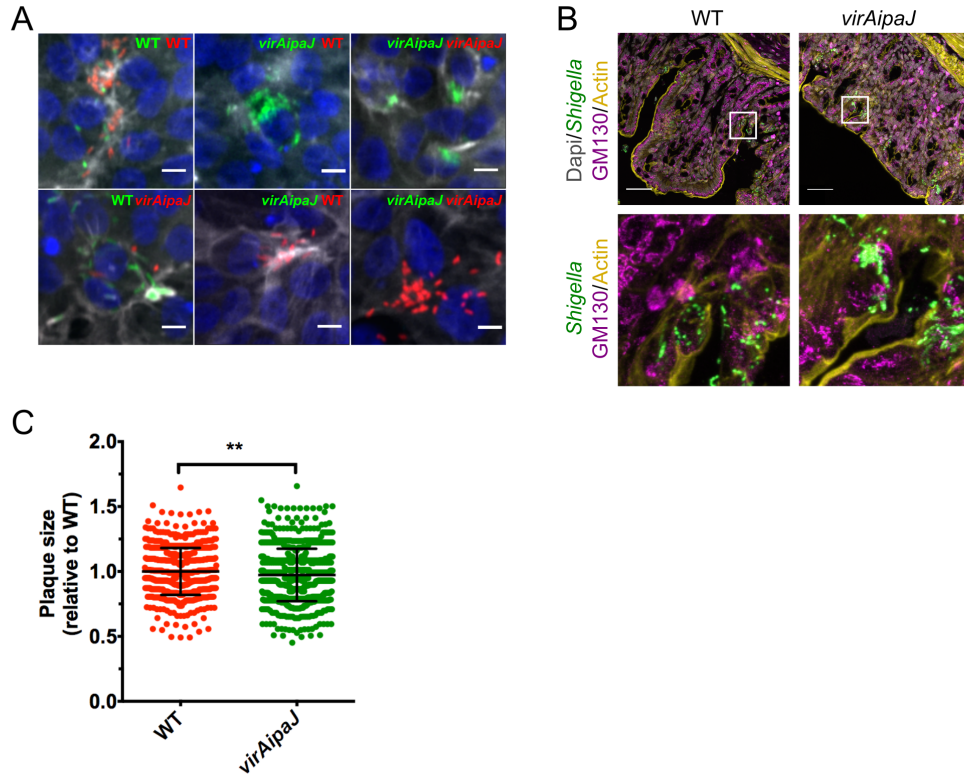

**Fig. S4:** (A) Caco-2/TC7 cells were primo-infected with GFP-expressing WT or *virAipaJ* strains (green) for 4 hours, and then re-infected with the same strains but expressing dsRed for 2 more hours (red). Cells were fixed and stained with Dapi (blue) and Phalloidin-AF647 (white). Scale bar: 10  $\mu$ m. (B) IpaJ and VirA induce Golgi apparatus disruption in an *in vivo* model of shigellosis. Guinea pigs were infected intrarectally with GFP-expressing WT or *virAipaJ* strains and sacrificed 4 hours post-infection. The colonic tissue was fixed, cut and labeled with anti-GM130 (*cis*-Golgi), Phalloidin-AF647 (actin) and Dapi (nuclei). Scale bars: 50  $\mu$ m. (C) Plaque assays were performed by infecting Caco-2/TC7 cell monolayers with either WT or *virAipaJ* strains for 48 hours. Mean  $\pm$  SD, n = 3 independent experiments. \*\* p<0.01 (unpaired two-tailed Welch's *t*-test).

**Table S1:** Apical and Basal secretomes of *S. flexneri* infected cells compared to uninfected cells. ID: protein identifier; WT: WT *S. flexneri* infection; UI: uninfected cells; virAipaJ: *virAipaJ* *S. flexneri* mutant; SP: signal peptide.

| Apical Secretome_Less secreted |                                                       |                  |             |                        |             |    |                                                            |
|--------------------------------|-------------------------------------------------------|------------------|-------------|------------------------|-------------|----|------------------------------------------------------------|
| ID                             | Description                                           | log2 ratio WT/UI | p-value     | log2 ratio virAipaJ/UI | p-value     | SP | Protein class                                              |
| Q9NR30                         | Nucleolar RNA helicase 2                              | -1.072528254     | 0.009176105 | -0.549899695           | 0.543824377 | -  | enzyme                                                     |
| O00515                         | Ladinin-1                                             | -0.901708044     | 0.020132052 | -0.040926188           | 0.98114634  | -  | structural protein                                         |
| O15372                         | Eukaryotic translation initiation factor 3 subunit H  | -2.17768958      | 0.037502682 | 0.693417745            | 0.579838846 | -  | hydrolase metalloprotease                                  |
| O75390                         | Citrate synthase, mitochondrial                       | -1.279822363     | 0.005714955 | -0.933809389           | 0.20341321  | -  | lyase transferase                                          |
| P15144                         | Aminopeptidase N                                      | -1.696619272     | 0.041157819 | -0.528181466           | 0.811421783 | -  | hydrolase metalloprotease                                  |
| P27487                         | Dipeptidyl peptidase 4                                | -1.119890251     | 0.019717833 | -0.116367639           | 0.950407398 | -  | enzyme modulator hydrolase                                 |
| P46782                         | 40S ribosomal protein S5                              | -0.876133518     | 0.022861358 | -0.459930768           | 0.482225647 | -  | nucleic acid binding                                       |
| Q14011                         | Cold-inducible RNA-binding protein                    | -0.615170382     | 0.04174039  | -0.100689416           | 0.930926354 | -  | nucleic acid binding                                       |
| Q15393                         | Splicing factor 3B subunit 3                          | -1.100422107     | 0.018986403 | -0.354041732           | 0.664209046 | -  | nucleic acid binding                                       |
| Q92484                         | Acid sphingomyelinase-like phosphodiesterase 3a       | -2.755432112     | 0.029673948 | -0.234737391           | 0.962922352 | +  | hydrolase                                                  |
| P54802                         | Alpha-N-acetylglucosaminidase                         | -2.09901404      | 1.08329e-13 | -0.966313613           | 0.003282959 | +  | hydrolase glycosidase                                      |
| P19801                         | Amlonide-sensitive amine oxidase [copper-containing]  | -5.230349024     | 0.007959639 | -2.174914133           | 0.527077691 | +  | oxidoreductase                                             |
| P02647                         | Apolipoprotein A-I                                    | -3.770306863     | 3.42792e-16 | -1.478777761           | 0.002648721 | +  | transfer/carrier cholesterol transport stress response     |
| P06727                         | Apolipoprotein A-IV                                   | -3.916345947     | 2.94833e-07 | -0.435649878           | 0.875016256 | +  | transfer/carrier cholesterol transport stress              |
| P04114                         | Apolipoprotein B-100                                  | -2.168899312     | 3.42792e-16 | -0.798189399           | 0.005171494 | +  | transfer/carrier cholesterol transport                     |
| P02656                         | Apolipoprotein C-III                                  | -3.952868123     | 0.017971834 | -1.595370023           | 0.411587773 | +  | transfer/carrier lipid transport                           |
| P02649                         | Apolipoprotein E                                      | -2.651775124     | 0.000615245 | -1.222471386           | 0.289896353 | +  | cholesterol transport cell differentiation stress response |
| P02749                         | Beta-2-glycoprotein 1                                 | -2.840928212     | 5.41563e-11 | -1.00072888            | 0.005551265 | +  | Cell-cell adhesion signaling                               |
| P19835                         | Bile salt-activated lipase                            | -2.946806725     | 0.000190912 | -1.512317497           | 0.114588885 | +  | hydrolase lipase                                           |
| Q8NF28                         | Cell adhesion molecule 4                              | -1.663926779     | 0.011039695 | -0.490880893           | 0.745206979 | +  | cell adhesion                                              |
| P10909                         | Clusterin                                             | -3.289370598     | 4.80282e-06 | -2.361170244           | 0.00202787  | +  | enzyme                                                     |
| P39060                         | Collagen alpha-1(XVIII) chain                         | -1.602212468     | 0.037332003 | 0.000662118            | 0.999513715 | +  | ECM                                                        |
| P01034                         | Cystatin-C                                            | -1.81423565      | 0.002690456 | -0.666114156           | 0.358087873 | +  | enzyme modulator                                           |
| P24855                         | Deoxyribonuclease-1                                   | -3.224205165     | 3.24603e-05 | -1.216528549           | 0.184676547 | +  | hydrolase nucleic acid binding                             |
| Q01459                         | Di-N-acetylchitobiase                                 | -3.42920159      | 0.00567896  | -1.047483268           | 0.553934681 | +  | hydrolase                                                  |
| P00533                         | Epidermal growth factor receptor                      | -2.674587265     | 1.40611e-05 | -0.833914063           | 0.31330118  | +  | receptor signaling                                         |
| P22455                         | Fibroblast growth factor receptor 4                   | -1.517883257     | 0.00127772  | -1.243800291           | 0.01740424  | +  | receptor signaling                                         |
| Q08380                         | Galectin-3-binding protein                            | -2.245544148     | 4.80282e-06 | -0.032492566           | 0.987175607 | +  | cell adhesion ECM                                          |
| P35052                         | Glypican-1                                            | -2.60317129      | 2.9743e-09  | -0.809684252           | 0.114588885 | +  | heparan sulfate binding                                    |
| P51654                         | Glypican-3                                            | -3.110516585     | 2.24908e-12 | -1.096559712           | 0.000645332 | +  | heparan sulfate binding                                    |
| Q92896                         | Golgi apparatus protein 1                             | -1.041857419     | 0.003268394 | -0.255198414           | 0.735160609 | +  | ECM                                                        |
| P08581                         | Hepatocyte growth factor receptor                     | -2.90469601      | 0.001880556 | -0.748067091           | 0.843235782 | +  | receptor signaling                                         |
| Q8WWA0                         | Intelectin-1                                          | -4.160799167     | 1.18419e-05 | -1.253662182           | 0.448141148 | +  | defense/immunity                                           |
| Q8WVU7                         | Intelectin-2                                          | -3.354673066     | 7.94067e-10 | -1.166277392           | 5.6509e-05  | +  | defense/immunity                                           |
| P05362                         | Intercellular adhesion molecule 1                     | -1.740581759     | 0.000554569 | 0.078685369            | 0.964781211 | +  | cell adhesion ECM                                          |
| O43278                         | Kunitz-type protease inhibitor 1                      | -2.213292313     | 5.09615e-09 | -0.890337415           | 0.080588616 | +  | enzyme modulator                                           |
| P01130                         | Low-density lipoprotein receptor                      | -1.828778698     | 0.010472209 | -1.124808228           | 0.472513044 | +  | lipid transport                                            |
| O75581                         | Low-density lipoprotein receptor-related protein 6    | -2.042580795     | 0.03114173  | -0.245697834           | 0.929085707 | +  | signaling                                                  |
| O00754                         | Lysosomal alpha-mannosidase                           | -1.340026936     | 0.000256636 | -0.53437202            | 0.406689163 | +  | hydrolase glycosidase                                      |
| P42785                         | Lysosomal Pro-X carboxypeptidase                      | -0.95041666      | 0.000999696 | -0.101731223           | 0.919615924 | +  | hydrolase serine-protease                                  |
| Q9H8J5                         | MANSC domain-containing protein 1                     | -2.312417389     | 0.000216978 | -0.821504026           | 0.381236027 | +  | ?                                                          |
| Q6UXI9                         | Nephronectin                                          | -2.341609519     | 0.043700168 | -1.257987913           | 0.479420882 | +  | cell-cell adhesion ECM                                     |
| P61916                         | NPC intracellular cholesterol transporter 2           | -2.062981637     | 0.000115307 | -0.49529118            | 0.518527857 | +  | transfer/carrier cholesterol transport                     |
| Q98TY2                         | Plasma alpha-L-fucosidase                             | -2.899768911     | 3.74973e-05 | -1.500273028           | 0.06962011  | +  | hydrolase glycosidase                                      |
| O15031                         | Plexin-B2                                             | -2.083791668     | 0.005040614 | -0.884717667           | 0.479420882 | +  | receptor signaling                                         |
| Q15113                         | Procollagen C-endopeptidase enhancer 1                | -2.871186463     | 0.047670998 | -1.34267566            | 0.561908896 | +  | enzyme modulator                                           |
| Q07954                         | Prolow-density lipoprotein receptor-related protein 1 | -1.572789608     | 8.82014e-08 | -0.789571718           | 0.03414508  | +  | ?                                                          |
| P07602                         | Prosaposin                                            | -1.726286625     | 3.77926e-08 | -0.917842143           | 0.001488222 | +  | ?                                                          |
| P78504                         | Protein jagged-1                                      | -2.655490275     | 0.000115176 | -0.792980521           | 0.24438053  | +  | signaling                                                  |
| O00584                         | Ribonuclease T2                                       | -3.007530685     | 0.047294455 | -1.430674438           | 0.490124737 | +  | enzyme                                                     |
| Q9UGT4                         | Sushi domain-containing protein 2                     | -0.828972816     | 0.01739049  | 0.095736124            | 0.945593165 | +  | defense/immunity                                           |
| P04066                         | Tissue alpha-L-fucosidase                             | -2.449846813     | 5.35154e-05 | -0.8962332             | 0.334821933 | +  | hydrolase glycosidase                                      |
| O00300                         | Tumor necrosis factor receptor superfamily member 11B | -5.062178219     | 0.001963304 | -0.916293698           | 0.648849883 | +  | receptor defense/immunity                                  |
| Q03405                         | Urokinase plasminogen activator surface receptor      | -3.813992228     | 6.13582e-07 | -1.25186322            | 0.047391062 | +  | receptor                                                   |
| P07225                         | Vitamin K-dependent protein S                         | -4.474216837     | 2.54396e-10 | -1.420369843           | 0.016132286 | +  | enzyme modulator                                           |
| P04004                         | Vitronectin                                           | -2.982579992     | 0.000197241 | -1.11602366            | 0.310312981 | +  | cell adhesion                                              |

|        |                                                                      |              |             |              |             |   |                                                |
|--------|----------------------------------------------------------------------|--------------|-------------|--------------|-------------|---|------------------------------------------------|
| O00462 | Beta-mannosidase                                                     | -2.702760859 | 0.002410331 | -1.127260251 | 0.226669752 | + | hydrolase glycosidase                          |
| O00468 | Agtrin                                                               | -1.737747334 | 3.70417e-05 | -0.475806507 | 0.55248196  | + | ECM enzyme modulator receptor                  |
| O14773 | Tripeptidyl-peptidase 1                                              | -2.631882179 | 0.000915453 | -1.00872291  | 0.518527857 | + | hydrolase serine-protease                      |
| O43895 | Xaa-Pro aminopeptidase 2                                             | -1.53625792  | 0.001608684 | -0.56608487  | 0.612391974 | + | hydrolase nucleic acid binding metalloprotease |
| O75326 | Semaphorin-7A                                                        | -3.539691041 | 2.38471e-16 | -1.344262748 | 0.000163093 | + | signaling                                      |
| O75882 | Attractin                                                            | -3.506429141 | 1.76588e-15 | -0.807751537 | 0.181248181 | + | ECM enzyme modulator receptor                  |
| O75976 | Carboxypeptidase D                                                   | -1.509654772 | 0.001699526 | -1.1294363   | 0.034065376 | + | hydrolase                                      |
| O94985 | Calsyntenin-1                                                        | -3.161074006 | 0.000990967 | -1.001102039 | 0.338201356 | + | Ca binding cell adhesion                       |
| P00450 | Ceruloplasmin                                                        | -4.26040362  | 0.001749595 | -1.333213422 | 0.334821933 | + | oxidoreductase                                 |
| P00734 | Prothrombin                                                          | -5.521919139 | 4.57527e-06 | -1.837239314 | 0.068742229 | + | hydrolase                                      |
| P00742 | Coagulation factor X                                                 | -4.508410734 | 0.000148666 | -0.60204236  | 0.8172103   | + | hydrolase                                      |
| P00751 | Complement factor B                                                  | -2.862149116 | 2.00228e-06 | -0.854005705 | 0.349027168 | + | hydrolase serin-protease                       |
| P01009 | Alpha-1-antitrypsin                                                  | -3.814094495 | 1.69706e-22 | -1.22669808  | 0.002879415 | + | hydrolase                                      |
| P01019 | Angiotensinogen                                                      | -4.089063862 | 2.80835e-14 | -0.836024591 | 0.339487412 | + | hydrolase                                      |
| P01033 | Metalloproteinase inhibitor 1                                        | -3.537151001 | 0.000220074 | -1.556984196 | 0.200956399 | + | enzyme modulator                               |
| P01042 | Kinogen-1                                                            | -3.336751227 | 5.58542e-07 | -0.957204588 | 0.379581202 | + | enzyme modulator                               |
| P02675 | Fibrinogen beta chain                                                | -2.900053829 | 1.81789e-05 | -1.105811058 | 0.187612576 | + | signaling                                      |
| P02679 | Fibrinogen gamma chain                                               | -2.650129695 | 0.005099706 | -0.248842688 | 0.945593165 | + | signaling                                      |
| P02751 | Fibronectin                                                          | -2.892777969 | 8.12678e-08 | -0.795085642 | 0.31330118  | + | signaling                                      |
| P02753 | Retinol-binding protein 4                                            | -2.465348497 | 1.6744e-05  | -1.000450291 | 0.238713661 | + | transfer/carrier                               |
| P02765 | Alpha-2-HS-glycoprotein                                              | -3.435548473 | 4.63006e-08 | -0.642925268 | 0.569813023 | + | enzyme modulator                               |
| P02766 | Transhyretin                                                         | -4.169509128 | 2.98341e-07 | -0.184429086 | 0.959155064 | + | transfer/carrier transporter                   |
| P02768 | Serum albumin                                                        | -3.518172947 | 1.94206e-18 | -0.943331156 | 0.024246672 | + | transfer/carrier                               |
| P02771 | Alpha-fetoprotein                                                    | -3.626089192 | 1.14551e-20 | -1.41259489  | 0.003931815 | + | transfer/carrier                               |
| P02790 | Hemopexin                                                            | -4.816256767 | 0.026155772 | -2.061239254 | 0.518527857 | + | hydrolase                                      |
| P05067 | Amyloid beta A4 protein                                              | -4.098788616 | 0.002075131 | -1.091378053 | 0.518527857 | + | enzyme modulator                               |
| P06865 | Beta-hexosaminidase subunit alpha                                    | -2.367092607 | 1.10004e-05 | -0.120954044 | 0.959155064 | + | hydrolase glycosidase                          |
| P07339 | Cathepsin D                                                          | -1.370392365 | 0.001796267 | 0.48495812   | 0.664209046 | + | hydrolase                                      |
| P07686 | Beta-hexosaminidase subunit beta                                     | -1.683284597 | 0.000119003 | -0.805910193 | 0.195562828 | + | hydrolase glycosidase                          |
| P07858 | Cathepsin B                                                          | -1.775831189 | 0.037502682 | -0.838183895 | 0.472513044 | + | hydrolase enzyme modulator                     |
| P08582 | Melanotransferrin                                                    | -2.370202386 | 1.6525e-14  | -1.177250479 | 0.000859465 | + | receptor hydrolase transfer/carrier            |
| P08709 | Coagulation factor VII                                               | -3.312701112 | 0.000470211 | -1.004325085 | 0.187612576 | + | hydrolase                                      |
| P09923 | Intestinal-type alkaline phosphatase                                 | -1.276369818 | 0.001688077 | -0.736140993 | 0.226669752 | + | hydrolase phosphatase                          |
| P10253 | Lysosomal alpha-glycosidase                                          | -2.16482629  | 5.90379e-08 | -0.588326261 | 0.289896353 | + | hydrolase glucosidase                          |
| P10586 | Receptor-type tyrosine-protein phosphatase F                         | -2.520160293 | 7.31133e-05 | -1.249503795 | 0.151557305 | + | hydrolase phosphatase receptor                 |
| P10619 | Lysosomal protective protein                                         | -2.35202299  | 1.25516e-05 | -0.809098881 | 0.176132719 | + | hydrolase serine-protease                      |
| P11047 | Laminin subunit gamma-1                                              | -1.484704514 | 0.000375096 | -0.665986972 | 0.289896353 | + | ECM enzyme modulator receptor                  |
| P12109 | Collagen alpha-1(V) chain                                            | -3.384465418 | 1.82797e-19 | -1.575274609 | 1.75946e-05 | + | receptor                                       |
| P12821 | Angiotensin-converting enzyme                                        | -1.228117154 | 0.003353497 | -1.174052546 | 0.015887469 | + | hydrolase metalloprotease                      |
| P14384 | Carboxypeptidase M                                                   | -3.565776795 | 0.003796372 | -0.574012752 | 0.695821732 | + | hydrolase metalloprotease                      |
| P15289 | Arylsulfatase A                                                      | -0.951970901 | 0.000290899 | -0.414648239 | 0.289896353 | + | hydrolase                                      |
| P15586 | N-acetylglucosamine-6-sulfatase                                      | -2.678659866 | 5.8224e-05  | -0.49240207  | 0.761288285 | + | hydrolase                                      |
| P16035 | Metalloproteinase inhibitor 2                                        | -2.445567144 | 0.000588368 | -2.207155685 | 0.007622135 | + | enzyme modulator                               |
| P22692 | Insulin-like growth factor-binding protein 4                         | -4.981841233 | 0.036464109 | -1.16650411  | 0.843235782 | + | enzyme modulator                               |
| P40189 | Interleukin-6 receptor subunit beta                                  | -3.676661887 | 0.000784446 | -2.490746978 | 0.01825217  | + | defense/immunity                               |
| P48052 | Carboxypeptidase A2                                                  | -4.074445483 | 5.24827e-06 | -1.651946586 | 0.016132286 | + | hydrolase                                      |
| P53634 | Dipeptidyl peptidase 1                                               | -3.163421105 | 7.34655e-07 | -0.708798112 | 0.518527857 | + | hydrolase enzyme modulator                     |
| P98160 | Basement membrane-specific heparan sulfate proteoglycan core protein | -2.456713199 | 2.51835e-08 | -1.855418827 | 5.6509e-05  | + | ECM enzyme modulator receptor                  |
| Q02818 | Nucleobindin-1                                                       | -1.800173348 | 4.5499e-05  | -0.661131282 | 0.231377562 | + | Ca binding nucleic acid binding                |
| Q06481 | Amyloid-like protein 2                                               | -2.496441105 | 3.58965e-05 | -1.050859474 | 0.289896353 | + | enzyme modulator                               |
| Q08431 | Lactadherin                                                          | -3.626715751 | 7.78487e-06 | -1.287136198 | 0.114588885 | + | cell adhesion hydrolase receptor               |
| Q13421 | Mesothelin                                                           | -2.557540302 | 0.006728528 | -1.130892643 | 0.212438552 | + | ECM                                            |
| Q13443 | Disintegrin and metalloproteinase domain-containing protein 9        | -3.266587756 | 0.006212622 | -0.831811042 | 0.605128176 | + | hydrolase metalloprotease                      |
| Q15582 | Transforming growth factor-beta-induced protein ig-h3                | -2.512671218 | 0.033128595 | -1.239638028 | 0.37344535  | + | cell adhesion signaling                        |
| Q15904 | V-type proton ATPase subunit S1                                      | -2.478891712 | 0.000779695 | -1.36078358  | 0.206790838 | + | hydrolase transporter                          |
| Q16819 | Meprin A subunit alpha                                               | -3.567380956 | 1.69706e-22 | -0.989699422 | 0.002648721 | + | hydrolase                                      |
| Q86504 | G-protein coupled receptor 126                                       | -2.530405276 | 0.005795046 | -1.544077127 | 0.145339862 | + | defense/immunity receptor                      |
| Q8NHP8 | Putative phospholipase B-like 2                                      | -1.338750265 | 0.039704778 | -0.869689603 | 0.289896353 | + | hydrolase                                      |
| Q92673 | Sortilin-related receptor                                            | -2.029496346 | 3.59781e-08 | -0.182637689 | 0.929085707 | + | receptor transporter                           |
| Q92820 | Gamma-glutamyl hydrolase                                             | -3.221545027 | 0.005354742 | -0.858703609 | 0.750257531 | + | hydrolase                                      |
| Q92876 | Kallikrein-6                                                         | -2.515135245 | 0.044326751 | -1.240457088 | 0.431931219 | + | hydrolase                                      |



|        |                                       |              |             |              |             |   |                           |
|--------|---------------------------------------|--------------|-------------|--------------|-------------|---|---------------------------|
| Q99519 | Sialidase-1                           | -2.630696969 | 0.012832485 | -2.029647075 | 0.22939228  | + | hydrolase                 |
| Q99523 | Sortilin                              | -1.59966745  | 0.000256636 | -0.353783914 | 0.579838846 | + | receptor transporter      |
| Q9BQ57 | Hephaestin                            | -1.421112217 | 4.15775e-05 | -0.45456352  | 0.518527857 | + | oxidoreductase            |
| Q9BYF1 | Angiotensin-converting enzyme 2       | -3.302852067 | 4.03175e-22 | -1.018030793 | 0.002055761 | + | hydrolase metalloprotease |
| Q9H3G5 | Probable serine carboxypeptidase CPVL | -2.596663421 | 0.001880556 | -0.880312381 | 0.579838846 | + | hydrolase serine-protease |
| Q9HAT2 | Sialate O-acetyltransferase           | -1.772307888 | 0.044326751 | -1.596588246 | 0.289896353 | + | hydrolase                 |
| Q9UHL4 | Dipeptidyl peptidase 2                | -1.656231073 | 0.005714955 | -0.68055341  | 0.491090231 | + | hydrolase                 |
| Q9UNN8 | Endothelial protein C receptor        | -2.817000663 | 0.012507399 | -0.43351713  | 0.875737994 | + | enzyme modulator receptor |

#### Basal Secretome\_Less secreted

| ID     | Description                                           | log2 ratio<br>WT/Ut | p-value     | log2 ratio<br>virAipa/Ut | p-value     | SP | Protein class                                             |
|--------|-------------------------------------------------------|---------------------|-------------|--------------------------|-------------|----|-----------------------------------------------------------|
| P08758 | Annexin A5                                            | -1.62801464         | 0.018622276 | -1.158172856             | 0.185670339 | -  | enzyme regulator signal transduction                      |
| Q8NB34 | Golgi membrane protein 1                              | -1.092986292        | 0.010143159 | -0.572540669             | 0.231509058 | -  | ?                                                         |
| P08727 | Keratin, type I cytoskeletal 19                       | -2.074858939        | 0.00059044  | 0.013379057              | 0.98687303  | -  | structural                                                |
| Q8WVQ1 | Soluble calcium-activated nucleotidase 1              | -1.797250458        | 0.000620701 | -0.576670255             | 0.203638165 | -  | hydrolase                                                 |
| O60513 | Beta-1,4-galactosyltransferase 4                      | -1.486800427        | 0.011859212 | -0.350438985             | 0.607937785 | -  | transferase                                               |
| P05023 | Sodium/potassium-transporting ATPase subunit alpha-1  | -0.990374016        | 0.002142764 | -2.048518046             | 7.54839e-07 | -  | transporter hydrolase                                     |
| P06576 | ATP synthase subunit beta, mitochondrial              | -0.87880808         | 0.049391134 | -1.11937592              | 0.075205165 | -  | hydrolase Nucleic acid binding transporter                |
| P06753 | Tropomyosin alpha-3 chain                             | -0.813900575        | 0.003205936 | -0.422885876             | 0.127155705 | -  | cytoskeletal                                              |
| P09493 | Tropomyosin alpha-1 chain                             | -0.796639221        | 0.026836656 | -0.379725908             | 0.360428637 | -  | cytoskeletal                                              |
| P09622 | Dihydropyridyl dehydrogenase, mitochondrial           | -0.825620308        | 0.013899356 | -0.421066649             | 0.277249395 | -  | oxidoreductase                                            |
| P13798 | Acylamino-acid-releasing enzyme                       | -0.972970757        | 0.000596326 | -0.127096769             | 0.767547783 | -  | hydrolase                                                 |
| P19105 | Myosin regulatory light chain 12A                     | -1.572688615        | 0.014266744 | -0.877480378             | 0.202054219 | -  | cytoskeletal ca binding                                   |
| Q15043 | Zinc transporter ZIP14                                | -0.97384405         | 0.000777029 | -0.200727336             | 0.497172595 | -  | transporter                                               |
| Q99674 | Cell growth regulator with EF hand domain protein 1   | -2.338144571        | 0.000289998 | -0.658818557             | 0.165386152 | -  | transporter                                               |
| Q9H8J5 | MAN5C domain-containing protein 1                     | -0.685391203        | 0.02304981  | -0.469465831             | 0.1609184   | +  | ?                                                         |
| P54802 | Alpha-N-acetylglucosaminidase                         | -1.210866266        | 0.001363294 | -1.569381066             | 0.00028594  | +  | hydrolase glycosidase                                     |
| P19801 | Amiloride-sensitive amine oxidase [copper-containing] | -1.271825603        | 0.00046389  | -1.243707141             | 0.002538863 | +  | oxidoreductase                                            |
| P06727 | Apolipoprotein A-IV                                   | -1.562850238        | 0.014956961 | -1.171540764             | 0.097779631 | +  | transporter/carrier cholesterol transport stress response |
| P19835 | Bile salt-activated lipase                            | -1.540842913        | 0.003754753 | -0.837336132             | 0.127155705 | +  | hydrolase lipase cell adhesion                            |
| Q99795 | Cell surface A33 antigen                              | -1.121572889        | 0.0172936   | -0.867944876             | 0.100466639 | +  | signaling (putative)                                      |
| P00751 | Complement factor B                                   | -1.749108182        | 0.000596326 | -1.015130791             | 0.070322958 | +  | hydrolase serin protease immunity                         |
| P78310 | Coxsackievirus and adenovirus receptor                | -1.800415874        | 0.034355278 | -0.902911247             | 0.220028769 | +  | receptor cell adhesion                                    |
| P01034 | Cystatin-C                                            | -2.90377613         | 0.000161382 | 0.397172402              | 0.691030219 | +  | enzyme regulator                                          |
| Q9NZV1 | Cysteine-rich motor neuron 1 protein                  | -2.122951301        | 0.002864811 | -0.819709241             | 0.228598539 | +  | signaling                                                 |
| Q01459 | Di-N-acetylchitobiase                                 | -1.893577477        | 0.000796033 | -1.118667886             | 0.021516508 | +  | hydrolase glycosidase                                     |
| Q9UBP4 | Dickkopf-related protein 3                            | -2.464894632        | 0.004910362 | -1.2170037               | 0.158665628 | +  | signaling                                                 |
| Q8N8Z6 | Discoidin, CUB and LCCL domain-containing protein 1   | -1.6425231          | 0.014498196 | -0.681111973             | 0.42302454  | +  | ?                                                         |
| Q9Y2E5 | Epididymis-specific alpha-mannosidase                 | -1.116309872        | 0.000133369 | -0.737419392             | 0.00949202  | +  | hydrolase glycosidase                                     |
| P02671 | Fibrinogen alpha chain                                | -0.949492913        | 0.048730548 | -1.034629453             | 0.026309113 | +  | immunity hemostasis                                       |
| P23142 | Fibulin-1                                             | -2.626513039        | 0.003480327 | -1.329534406             | 0.064177939 | +  | ECM                                                       |
| Q08380 | Galectin-3-binding protein                            | -1.462942258        | 0.000320941 | -0.650814036             | 0.146435561 | +  | cell adhesion ECM                                         |
| Q16270 | Insulin-like growth factor-binding protein 7          | -1.702605284        | 0.032101957 | -0.794264778             | 0.39306042  | +  | cell adhesion signaling                                   |
| Q8WWA0 | Intelectin-1                                          | -1.683808916        | 0.02430003  | -1.185428743             | 0.154823206 | +  | immunity                                                  |
| Q9Y624 | Junctional adhesion molecule A                        | -1.495981913        | 0.037008294 | 0.306638252              | 0.74006391  | +  | cell adhesion                                             |
| P02750 | Leucine-rich alpha-2-glycoprotein                     | -1.132476439        | 0.02297713  | -0.959668734             | 0.078331147 | +  | signaling?                                                |
| O75581 | Low-density lipoprotein receptor-related protein 6    | -0.806011079        | 0.026174915 | 0.124338725              | 0.782556882 | +  | signaling                                                 |
| Q9BRK3 | Matrix-remodeling-associated protein 8                | -1.463346939        | 0.046295635 | 0.418714295              | 0.686256242 | +  | ?                                                         |
| Q9UNW1 | Multiple inositol polyphosphate phosphatase 1         | -1.098464469        | 0.003433909 | -0.421408531             | 0.309399832 | +  | hydrolase                                                 |
| O14786 | Neuropilin-1                                          | -1.388523405        | 0.008139612 | -1.260753549             | 0.013392613 | +  | signaling receptor                                        |
| Q15113 | Procollagen C-endopeptidase enhancer 1                | -2.089968084        | 0.000446516 | -1.178828189             | 0.09217552  | +  | enzyme regulator                                          |
| P28300 | Protein-lysine 6-oxidase                              | -2.162479663        | 0.000132743 | -0.588570107             | 0.257285049 | +  | oxidoreductase                                            |
| O75787 | Renin receptor                                        | -2.741396474        | 0.021822359 | -1.340245491             | 0.288971213 | +  | receptor                                                  |
| P07996 | Thrombospondin-1                                      | -1.318553234        | 0.001061939 | -0.913750815             | 0.035617791 | +  | cell adhesion                                             |
| P07225 | Vitamin K-dependent protein 5                         | -2.07529797         | 0.000345722 | -0.759202205             | 0.254577406 | +  | enzyme regulator                                          |
| P25311 | Zinc-alpha-2-glycoprotein                             | -2.263707686        | 0.000495561 | -1.325405443             | 0.025306466 | +  | transporter                                               |
| O60844 | Zymogen granule membrane protein 16                   | -1.001200637        | 0.049747749 | -1.280860913             | 0.027117594 | +  | transporter                                               |

|        |                                                        |              |             |              |             |   |                                     |
|--------|--------------------------------------------------------|--------------|-------------|--------------|-------------|---|-------------------------------------|
| O14773 | Tripeptidyl-peptidase 1                                | -0.987006362 | 0.031180347 | 0.254912755  | 0.655641709 | + | hydrolase                           |
| O15230 | Laminin subunit alpha-5                                | -1.061541332 | 0.016169403 | -1.148727406 | 0.025306466 | + | ECM enzyme regulator receptor       |
| O75882 | Attractin                                              | -1.63959283  | 0.00059044  | -0.107970969 | 0.877939664 | + | ECM enzyme regulator receptor       |
| O75976 | Carboxypeptidase D                                     | -0.647466752 | 0.005770614 | -0.456306554 | 0.114190332 | + | hydrolase                           |
| O95633 | Follistatin-related protein 3                          | -2.538103547 | 0.002614623 | -0.382379001 | 0.656276059 | + | enzyme modulator                    |
| P00742 | Coagulation factor X                                   | -1.929494089 | 0.045488116 | -0.577528019 | 0.552225236 | + | hydrolase                           |
| P01019 | Angiotensinogen                                        | -1.290813122 | 0.000163361 | -0.516221069 | 0.200146814 | + | enzyme modulator                    |
| P01033 | Metalloproteinase inhibitor 1                          | -1.781791112 | 0.018627212 | -0.62222561  | 0.480386978 | + | enzyme modulator                    |
| P02766 | Transthyretin                                          | -2.076699212 | 0.033490097 | -2.322213792 | 0.019549423 | + | transfer/carrier transporter        |
| P02771 | Alpha-fetoprotein                                      | -1.445966818 | 0.000737818 | -1.482357766 | 0.002015158 | + | transfer/carrier                    |
| P05067 | Amyloid beta A4 protein                                | -2.079392488 | 0.003067314 | -0.601325911 | 0.565656753 | + | enzyme modulator                    |
| P06865 | Beta-hexosaminidase subunit alpha                      | -0.812617059 | 0.014494741 | -0.73827602  | 0.047649743 | + | hydrolase                           |
| P07942 | Laminin subunit beta-1                                 | -0.714375975 | 0.040280202 | -0.74279563  | 0.078331147 | + | ECM enzyme regulator receptor       |
| P10253 | Lysosomal alpha-glucosidase                            | -0.894254227 | 0.006109331 | -0.617752675 | 0.143375231 | + | hydrolase                           |
| P10619 | Lysosomal protective protein                           | -0.925473476 | 0.003590439 | -0.553188976 | 0.03436407  | + | hydrolase                           |
| P13497 | Bone morphogenetic protein 1                           | -1.872013616 | 0.000769331 | -1.502142298 | 0.009733934 | + | hydrolase                           |
| P19957 | Elafin                                                 | -1.092446328 | 0.000101089 | -0.136414544 | 0.527664445 | + | enzyme modulator                    |
| P26927 | Hepatocyte growth factor-like protein                  | -1.675360956 | 0.002350559 | -0.332811967 | 0.607937785 | + | hydrolase                           |
| P29122 | Proprotein convertase subtilisin/kexin type 6          | -1.607945402 | 0.001169361 | -0.025941328 | 0.963847805 | + | hydrolase                           |
| P29622 | Kallistatin                                            | -1.564734637 | 0.028003975 | -0.603306225 | 0.391648171 | + | enzyme modulator                    |
| P42785 | Lysosomal Pro-X carboxypeptidase                       | -0.979644156 | 0.000184454 | -0.384506238 | 0.118436167 | + | hydrolase                           |
| Q06481 | Amyloid-like protein 2                                 | -3.650465749 | 0.000238744 | -0.233373086 | 0.862810356 | + | enzyme modulator                    |
| Q06828 | Fibromodulin                                           | -2.378853667 | 0.003005031 | -1.528915042 | 0.054697255 | + | hydrolase                           |
| Q12913 | Receptor-type tyrosine-protein phosphatase eta         | -2.521355719 | 0.01182516  | -1.008950738 | 0.314298615 | + | hydrolase                           |
| Q13214 | Semaphorin-3B                                          | -1.660290797 | 0.000954431 | -1.650853799 | 0.002574994 | + | signaling                           |
| Q15582 | Transforming growth factor-beta-induced protein ig-h3  | -1.879888923 | 0.030695926 | -1.141606834 | 0.181513283 | + | cell adhesion signaling             |
| Q6PCB0 | von Willebrand factor A domain-containing protein 1    | -1.493920127 | 0.000173389 | -1.379034416 | 0.000870371 | + | receptor                            |
| Q865Q4 | G-protein coupled receptor 126                         | -2.041882281 | 0.004831223 | -0.573639426 | 0.424571009 | + | defense/immunity hydrolase receptor |
| Q92820 | Gamma-glutamyl hydrolase                               | -0.968491723 | 0.021502437 | -0.900015849 | 0.056356608 | + | hydrolase                           |
| Q92824 | Proprotein convertase subtilisin/kexin type 5          | -1.905747126 | 0.002562959 | -1.963914565 | 0.001803598 | + | hydrolase                           |
| Q9G2M7 | Tubulointerstitial nephritis antigen-like              | -1.714995157 | 0.015403442 | -0.882040597 | 0.23541511  | + | hydrolase enzyme modulator          |
| Q9UJ9  | N-acetylglucosamine-1-phosphotransferase subunit gamma | -1.474068362 | 0.005256764 | -1.757722546 | 0.001494984 | + | enzyme modulator transferase        |
